# Supplementary material
Source: Frontiers journal article supplement (https://www.frontiersin.org/articles/355107)

**Supplementary Figure S1.** Circular genome map of *S.algae* YHL. The circles show from the outermost to the innermost: 1. DNA coordinates; 2, 3. Function-based color coded mapping of the CDSs predicted on the forward and reverse strands. Various functions are assigned different colors; 4. tRNA genes; 5. rRNA genes; 6. GC plot with regions above and below average in green and violet, respectively; 7. GC skew showing regions above and below average in yellow and light blue, respectively.

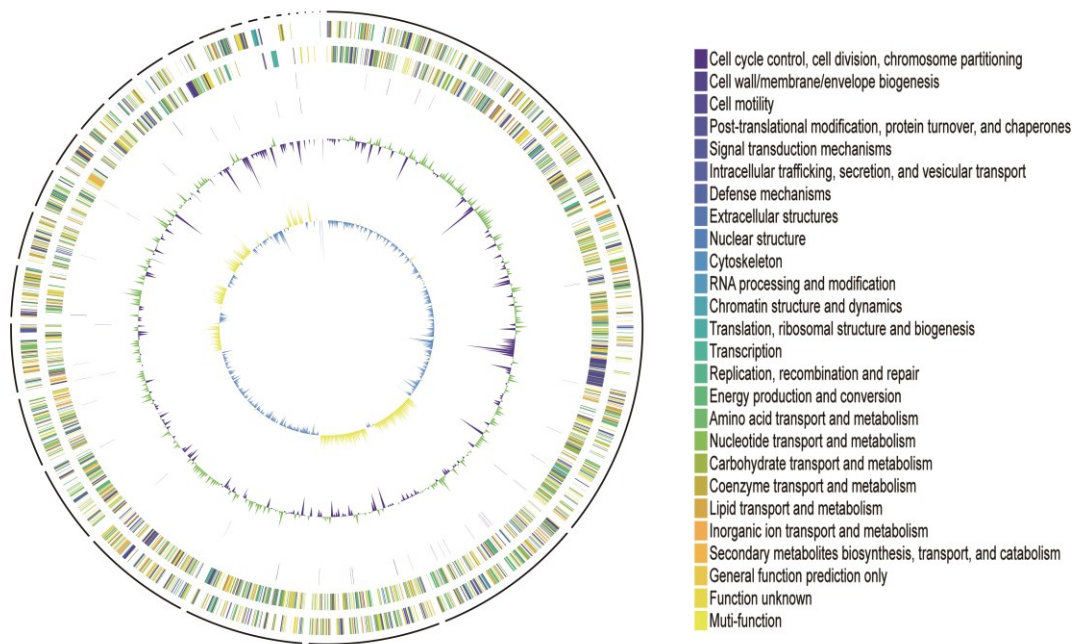

Supplement: Image_1.PDF [file Image_1.PDF]
